# Supplementary material for: First report of a chrysovirus infecting a member of the fungal genus Ilyonectria
Source: PubMed Central journal article supplement (PMC9556398; doi:10.1007/s00705-022-05551-2), 2022-08-13
Supplement: 705_2022_5551_MOESM1_ESM.pdf [file 705_2022_5551_MOESM1_ESM.pdf]

**Article title:**

First report of a chrysovirus infecting a member of the fungal genus *Ilyonectria*

**Journal:**

Archives of Virology

**Authors:**

Tom P. Pielhop, Carolin Popp, Dennis Knierim, Paolo Margaria, Edgar Maiß

**Corresponding author:**

Tom P. Pielhop, pielhop@ipp.uni-hannover.de

Institute of Horticultural Production Systems, Dept. Phytomedicine, Leibniz University

Hannover, Herrenhäuser Str. 2, 30419, Hannover, Germany.

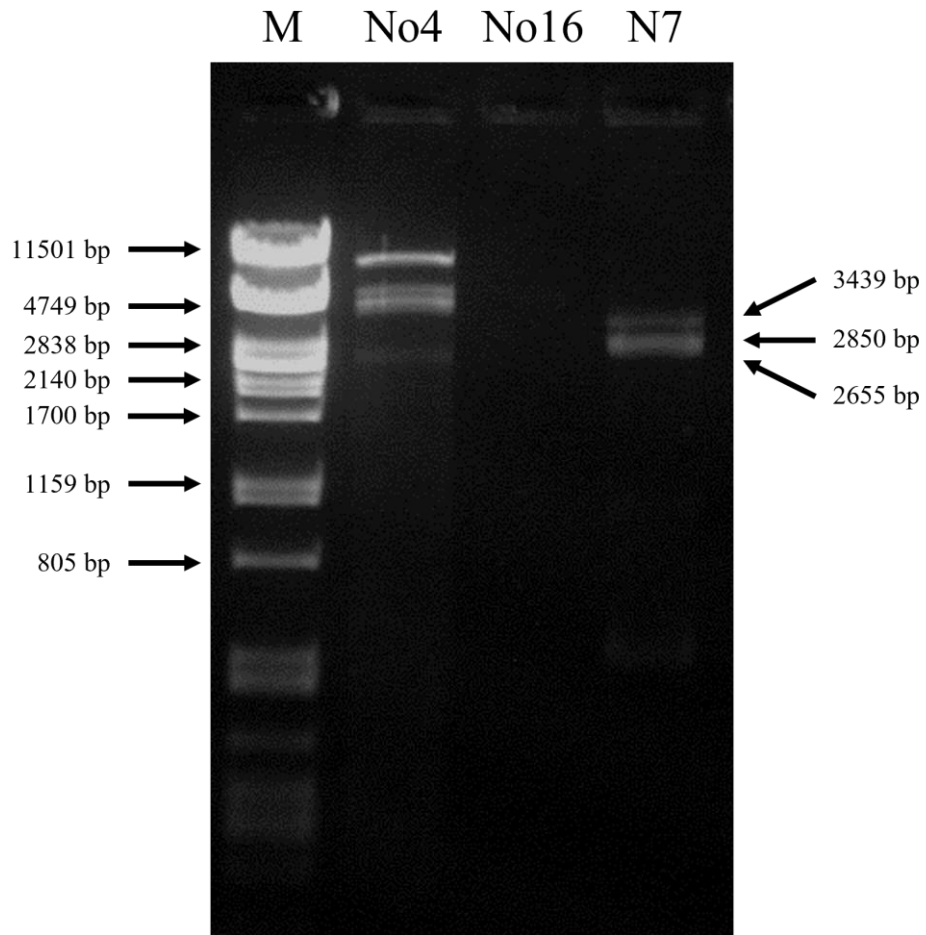

**Fig. ESM1:** 1 % agarose gel with dsRNA of different fungal isolates. Lines: **M:** DNA ladder (Phage lambda DNA, PstI digested); **No4:** *Rugonectria rugulosa*; **No16:** *Dactylonectria torresensis*, **N7:** *Ilyonectria pseudodestructans*.
