# Supplementary material for: First report of a chrysovirus infecting a member of the fungal genus Ilyonectria
Source: Springer Nature journal article supplement (doi:10.1007/s00705-022-05551-2), 2022-08-13
Supplement: MOESM2 [file 23363808]

**Article title:**

First report of a chrysovirus infecting a member of the fungal genus *Ilyonectria*

**Journal:**

Archives of Virology

**Authors:**

Tom P. Pielhop, Carolin Popp, Dennis Knierim, Paolo Margaria, Edgar Maiß

**Corresponding author:**

Tom P. Pielhop, pielhop@ipp.uni-hannover.de

Institute of Horticultural Production Systems, Dept. Phytomedicine, Leibniz University

Hannover, Herrenhäuser Str. 2, 30419, Hannover, Germany.

**Tab. ESM2:** Number of reads mapping the genomic RNAs of IpCV1. A total of 188,324 reads were generated from the sequencing of the library.

| <b>Virus</b> | <b>Genomic RNA</b> | <b>Length (nt)</b> | <b>Mapped reads</b> | <b>% of mapped reads</b> |
|--------------|--------------------|--------------------|---------------------|--------------------------|
| IpCV1        | 1                  | 3439               | 1508                | 0.80                     |
| IpCV1        | 2                  | 2850               | 1410                | 0.75                     |
| IpCV1        | 3                  | 2655               | 1687                | 0.90                     |
