# Supplementary material for: First report of a chrysovirus infecting a member of the fungal genus Ilyonectria
Source: Springer Nature journal article supplement (doi:10.1007/s00705-022-05551-2), 2022-08-13
Supplement: MOESM3 [file 23363808]

**Article title:**

First report of a chrysovirus infecting a member of the fungal genus *Ilyonectria*

**Journal:**

Archives of Virology

**Authors:**

Tom P. Pielhop, Carolin Popp, Dennis Knierim, Paolo Margaria, Edgar Maiß

**Corresponding author:**

Tom P. Pielhop, pielhop@ipp.uni-hannover.de

Institute of Horticultural Production Systems, Dept. Phytomedicine, Leibniz University  
Hannover, Herrenhäuser Str. 2, 30419, Hannover, Germany.

**Tab. ESM3:** Sequence identity (%) of IpCV1 with the alphachrysovirus, calculated with the EMBOSS/Needle software [12]. Sequence length and identity percentages of the nucleotide (ORF) and deduced aa sequence of the RdRp and CP are shown.

|                   | Acc. no   | ORF (RdRp)  |              | aa sequence (RdRp) |              | ORF (CP)         |              | aa sequence (CP)    |              |             |
|-------------------|-----------|-------------|--------------|--------------------|--------------|------------------|--------------|---------------------|--------------|-------------|
|                   |           | Length (nt) | Identity (%) | Length (aa)        | Identity (%) | Length (nt)      | Identity (%) | Length (aa)         | Identity (%) |             |
| <b>IpCV1</b>      | OM993531  | 3291        | -            | 1096               | -            | OM993532         | 2697         | -                   | 898          | -           |
| <b>CgCV1</b>      | NC_043666 | 3267        | <b>62.4</b>  | 1088               | <b>60.9</b>  | NC_043668        | 2703         | <b>52.5</b>         | 900          | <b>39.3</b> |
| <b>PtCV1</b>      | MH323409  | 3132        | <b>59.4</b>  | 1043               | <b>56.2</b>  | MH323410         | 2706         | <b>51</b>           | 901          | <b>38.9</b> |
| <b>HvV145S-A9</b> | NC_005978 | 3261        | <b>51.4</b>  | 1086               | <b>40.9</b>  | NC_005979        | 2688         | <b>46.6</b>         | 895          | <b>25.5</b> |
| <b>BmCV1</b>      | KY489954  | 3267        | <b>50.9</b>  | 1088               | <b>41</b>    | KY489955         | 2685         | <b>48.1</b>         | 894          | <b>25.8</b> |
| <b>CCRSACV</b>    | AJ781397  | 3264        | <b>50.9</b>  | 1087               | <b>36.4</b>  | AJ781398         | 2982         | <b>47.5</b>         | 993          | <b>26.7</b> |
| <b>AsCV1</b>      | MW656210  | 3255        | <b>50.8</b>  | 1084               | <b>39.6</b>  | MW656211         | 2718         | <b>48.1</b>         | 905          | <b>27.3</b> |
| <b>MpCV1</b>      | NC_043662 | 3318        | <b>50.5</b>  | 1105               | <b>36.9</b>  | NC_043664        | 2976         | <b>46.3</b>         | 991          | <b>22.1</b> |
| <b>PcV</b>        | NC_007539 | 3354        | <b>50.4</b>  | 1117               | <b>36</b>    | NC_007540        | 2949         | <b>43.6</b>         | 982          | <b>20.5</b> |
| <b>ACDACV</b>     | NC_009947 | 3264        | <b>50.1</b>  | 1087               | <b>36.3</b>  | NC_009946        | 2985         | <b>46.7</b>         | 994          | <b>26.1</b> |
| <b>AfCV</b>       | NC_038872 | 3345        | <b>49.9</b>  | 1114               | <b>36.4</b>  | NC_038873        | 2862         | <b>45.3</b>         | 953          | <b>24</b>   |
| <b>CCV1</b>       | NC_055655 | 3270        | <b>49.9</b>  | 1089               | <b>35.4</b>  | NC_055656        | 2868         | <b>45.8</b>         | 955          | <b>24.2</b> |
| <b>IjCV-1</b>     | NC_033277 | 3354        | <b>49.9</b>  | 1117               | <b>35.3</b>  | NC_033317        | 2925         | <b>46.1</b>         | 974          | <b>25</b>   |
| <b>BbCV1</b>      | MK279433  | 3348        | <b>49.4</b>  | 1115               | <b>35.8</b>  | MK279434         | 2931         | <b>45.4</b>         | 976          | <b>24.1</b> |
| <b>PrCV1</b>      | MK279429  | 3351        | <b>49.3</b>  | 1116               | <b>36.6</b>  | MK279430         | 2952         | <b>45.5</b>         | 983          | <b>23.4</b> |
| <b>VdCV1</b>      | NC_038784 | 3327        | <b>49.3</b>  | 1108               | <b>36.6</b>  | NC_038782        | 3051         | <b>43.3</b>         | 1016         | <b>19.7</b> |
| <b>PiCV1</b>      | MK214380  | 3354        | <b>49.2</b>  | 1117               | <b>36</b>    | MK214381         | 2949         | <b>44.3</b>         | 982          | <b>21.7</b> |
| <b>PrpCV1</b>     | MG887760  | 3354        | <b>48.8</b>  | 1117               | <b>37.1</b>  | MG887761         | 2702         | <b>44.6</b>         | 900          | <b>21.9</b> |
| <b>BcCV1</b>      | NC_043660 | 3441        | <b>48.5</b>  | 1146               | <b>33</b>    | NC_043659        | 3351         | <b>43.7</b>         | 1116         | <b>20.2</b> |
| <b>RsCV1</b>      | NC_043657 | 3417        | <b>48.5</b>  | 1138               | <b>31.6</b>  | NC_043656        | 3306         | <b>41.1</b>         | 1101         | <b>20.4</b> |
| <b>AMAV</b>       | NC_043676 | 3300        | <b>47.1</b>  | 1099               | <b>27.6</b>  | NC_043677        | 2994         | <b>44.2</b>         | 997          | <b>16.8</b> |
| <b>ZmCV1</b>      | NC_040510 | 3273        | <b>47.1</b>  | 1090               | <b>27.6</b>  | NC_040509        | 3981         | <b>40.5</b>         | 1326         | <b>14.6</b> |
| <b>CnCV1</b>      | NC_038778 | 2889        | <b>46</b>    | 962                | <b>32.7</b>  | NC_038779        | 2721         | <b>45.5</b>         | 906          | <b>22.6</b> |
| <b>PaCV</b>       | NC_043506 | 3282        | <b>45.5</b>  | 1093               | <b>27.5</b>  | NC_043508        | 3141         | <b>44.8</b>         | 1046         | <b>17.1</b> |
| <b>LiCV1</b>      | MN393162  | 2539        | <b>45</b>    | 846                | <b>38.9</b>  | MN393161         | 2316         | <b>48.1</b>         | 772          | <b>30.4</b> |
| <b>SV</b>         | MN661047  | 3363        | <b>44.8</b>  | 1120               | <b>24.6</b>  | MN661048         | 2850         | <b>42.7</b>         | 949          | <b>14.1</b> |
| <b>SCLV</b>       | NC_055224 | 3357        | <b>44.4</b>  | 1118               | <b>24.9</b>  | NC_055227        | 2709         | <b>42.5</b>         | 902          | <b>15.9</b> |
| <b>HCLV</b>       | MF176309  | 3357        | <b>44.3</b>  | 1118               | <b>23.7</b>  | MF176310         | 2853         | <b>45.1</b>         | 950          | <b>13.8</b> |
| <b>FoCV1</b>      | NC_043218 | 2553        | <b>49.4</b>  | 851                | <b>50.5</b>  | NC_043219        | 648          | Sequence incomplete |              |             |
| <b>PbcV</b>       | MG887763  | 1620        | <b>29.8</b>  | 539                | <b>9.6</b>   | No GenBank entry |              | <b>NA</b>           | <b>NA</b>    | <b>NA</b>   |
